# Supplementary material
Source: Springer Nature journal article supplement (https://www.springermedizin.de/resource/supplementary/13584_2012_41_MOESM5_ESM.pdf/9676844)

# Females

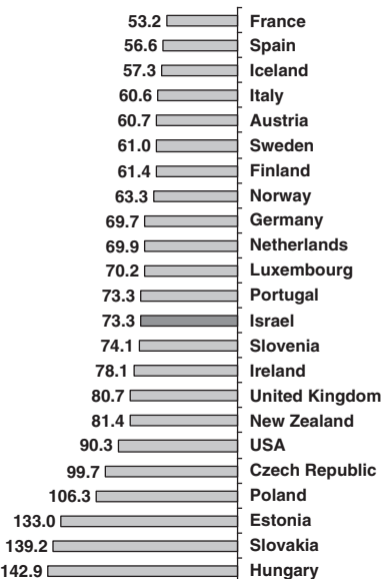

# Males

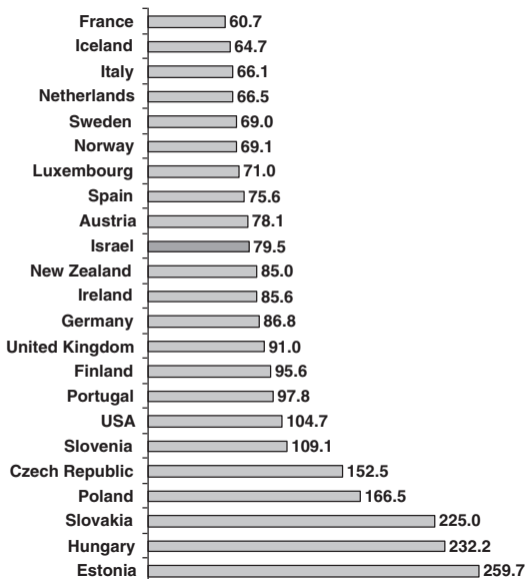

Supplement: MOESM5 [file 9676844]
